# Supplementary material
Source: PubMed Central journal article supplement (PMC4481874)
Supplement: NIHMS675323-supplement-01.pdf [file NIHMS675323-supplement-01.pdf]

Figure S1: Consort Diagram

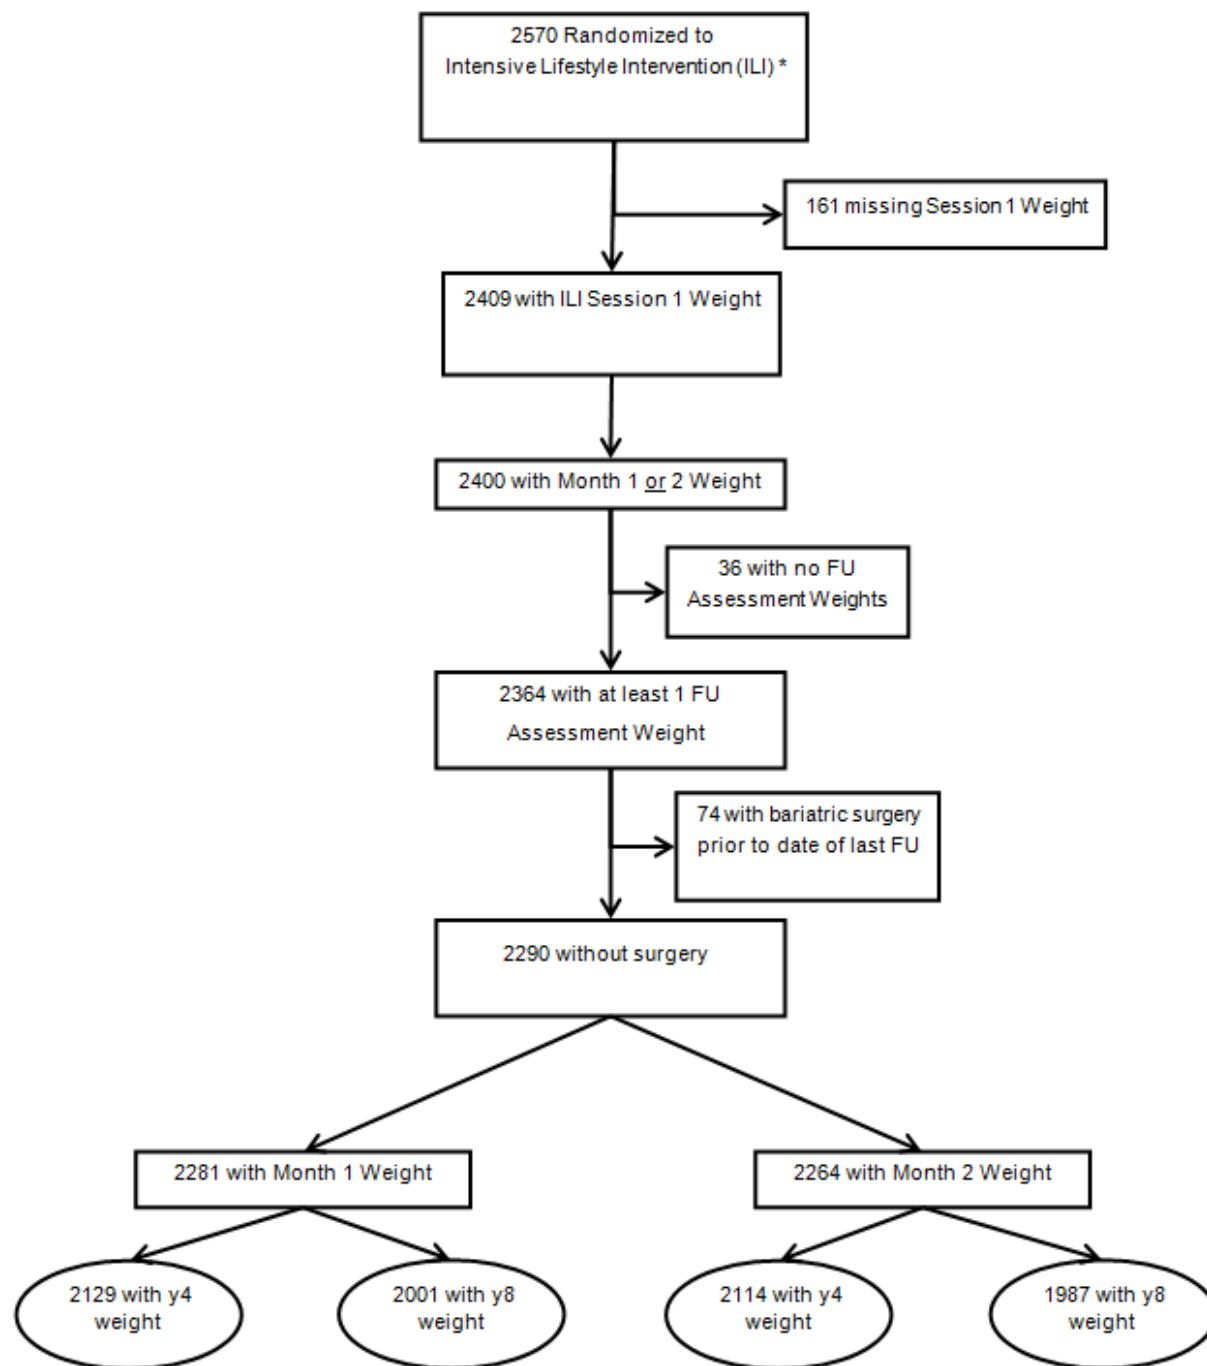

\* indicates that those participants excluded from the analyses (n=386) had a higher baseline BMI (37.5 vs. 35.6 kg/m<sup>2</sup>; p<0.001) and were more likely to be a minority (39.6% vs. 36.4% minority; p=0.04), compared to those participants included in the analyses (n=2184). Those included and those excluded did not differ on gender, age, or insulin usage (ps>0.05).

**Table S1:** Demographic characteristics of participants stratified by 2-month weight loss

|                                                   | <b>&lt; 3% weight loss<br/>N= 634</b> | <b>3-6% weight loss<br/>N=916</b> | <b>&gt;6% weight loss<br/>N=714</b> | <b>p-value<br/>diff across groups</b> |
|---------------------------------------------------|---------------------------------------|-----------------------------------|-------------------------------------|---------------------------------------|
| <b>BMI</b>                                        | 35.5 ± 0.24                           | 36.0 ± 0.20                       | 35.4 ± 0.22                         | 0.08                                  |
| <b>Waist circumference (cm)</b>                   | 112.3 ± 0.57                          | 113.4 ± 0.48                      | 114.1 ± 0.54                        | 0.32                                  |
| <b>Age (%)</b>                                    |                                       |                                   |                                     | 0.71                                  |
| 45-55 years                                       | 28.3                                  | 39.4                              | 32.3                                |                                       |
| 56-64 years                                       | 28.7                                  | 40.2                              | 31.1                                |                                       |
| 66-76 years                                       | 25.5                                  | 43.0                              | 31.5                                |                                       |
| <b>Gender (%)</b>                                 |                                       |                                   |                                     | <0.001                                |
| Male                                              | 22.3                                  | 37.7                              | 40.0                                |                                       |
| Female                                            | 31.9                                  | 42.4                              | 25.7                                |                                       |
| <b>Ethnicity (%)</b>                              |                                       |                                   |                                     | <0.001                                |
| African American                                  | 38.0                                  | 40.6                              | 21.3                                |                                       |
| American Indian/Native<br>American/Alaskan Native | 58.3                                  | 30.4                              | 11.3                                |                                       |
| Asian Pacific Islander                            | 24.1                                  | 48.3                              | 27.6                                |                                       |
| Caucasian                                         | 21.2                                  | 41.0                              | 37.8                                |                                       |
| Hispanic                                          | 36.6                                  | 40.6                              | 22.8                                |                                       |
| Other/Mixed                                       | 37.5                                  | 40.0                              | 22.5                                |                                       |
| <b>Education (%)</b>                              |                                       |                                   |                                     | <0.001                                |
| <13 years                                         | 35.0                                  | 38.2                              | 26.8                                |                                       |

|                                     |            |            |            |      |
|-------------------------------------|------------|------------|------------|------|
| 13-16 years                         | 30.0       | 42.3       | 27.6       |      |
| ≥16 years                           | 22.3       | 39.5       | 38.2       |      |
| <b>Duration of diabetes (years)</b> | 7.1 ± 0.27 | 6.5 ± 0.22 | 6.8 ± 0.25 | 0.08 |
| <b>Insulin usage (%)</b>            |            |            |            | 0.02 |
| Using insulin                       | 34.1       | 38.4       | 27.5       |      |
| Not using insulin                   | 27.0       | 40.7       | 32.3       |      |

Mean ± standard error for continuous variables
